# Supplementary material for: Inhibition of Integrin αvβ6 Activation of TGF‐β Attenuates Tendinopathy
Source: PubMed Central journal article supplement (PMC9009110; doi:10.1002/advs.202104469), 2022-02-15
Supplement: ADVS-9-2104469-s001.pdf [file ADVS-9-2104469-s001.pdf]

## Supporting Information

for *Adv. Sci.*, DOI: 10.1002/advs.202104469

Inhibition of integrin  $\alpha\beta_6$  activation of TGF- $\beta$  attenuates tendinopathy in mice

*Xiao Wang, Shen Liu, Tao Yu, Senbo An, Ruoxian Deng, Xiaohua Tan, Janet Crane, Dayu Pan, Mei Wan, Andrew Carr, Xu Cao\**

## Supporting Information

### **Inhibition of integrin $\alpha\beta6$ activation of TGF- $\beta$ attenuates tendinopathy in mice**

*Xiao Wang<sup>1</sup>, Shen Liu<sup>1</sup>, Tao Yu<sup>1</sup>, Senbo An<sup>1</sup>, Ruoxian Deng<sup>1</sup>, Xiaohua Tan<sup>1</sup>, Janet Crane<sup>1</sup>, Dayu Pan<sup>1</sup>, Mei Wan<sup>1</sup>, Andrew Carr<sup>2</sup>, Xu Cao<sup>1\*</sup>*

\*Corresponding author. Email: xcao11@jhmi.edu

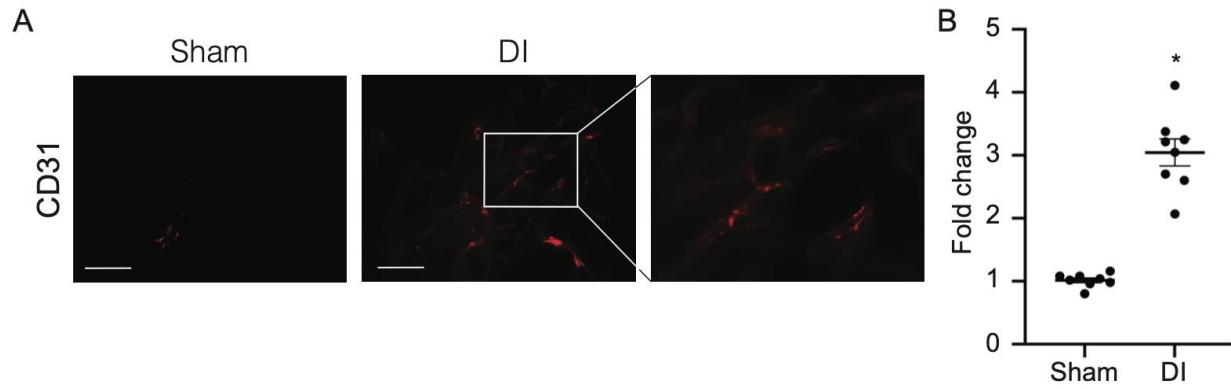

**Figure S1. Blood vessels were increased in the tendinopathic tendons.**

(A) Immunofluorescent staining of CD31<sup>+</sup> cells and (B) quantification of the fold change of blood vessels in mice 8 weeks after DI normalized to that of sham mice in the Achilles tendons. Scale bar: 200  $\mu$ m. All data are shown as the mean  $\pm$  standard deviation (n = 8 mice per group).

\*p < 0.05 compared with sham group as determined by unpaired, 2-tailed Student's *t*-test.

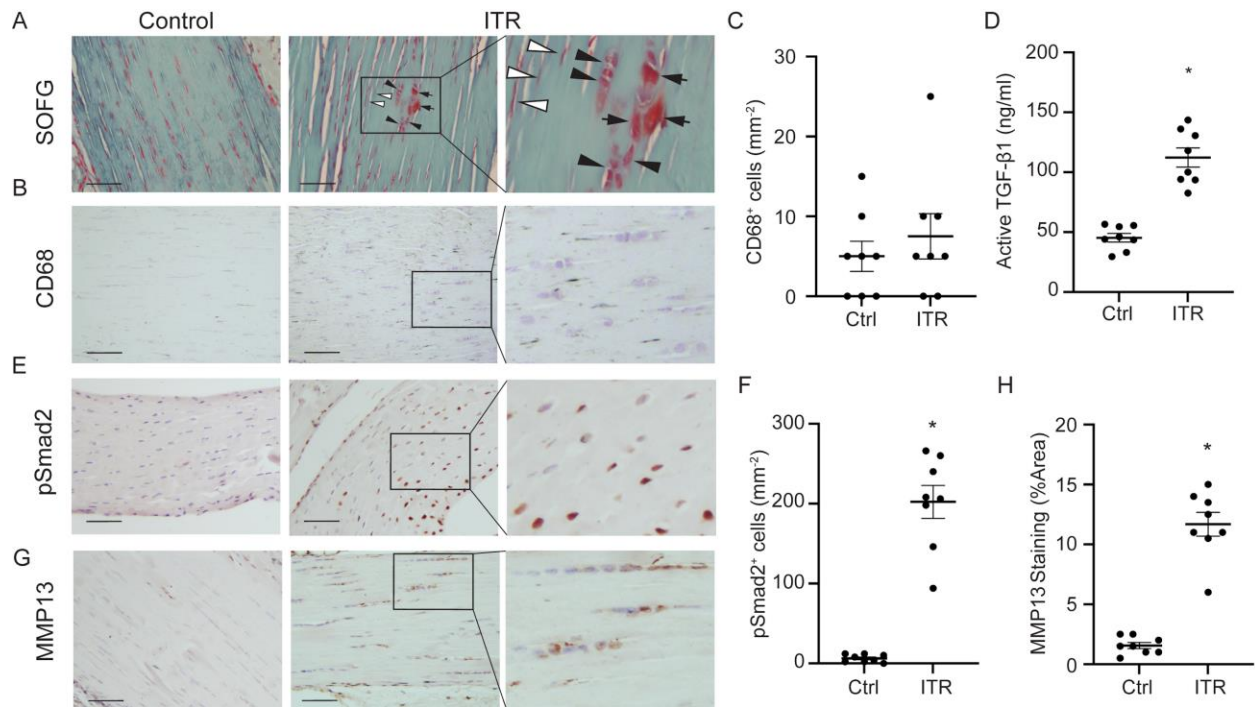

**Figure S2. Active TGF-β1 levels were elevated in intensive treadmill running (ITR) induced Achilles tendinopathy in mice.**

(A) Safranin-O and fast green (SOFG) staining of normal tendon (left column) and tendinopathic tendons (middle and right column) induced by ITR. Black arrows, proteoglycan (red), black arrowheads, chondrocyte-like cells; open arrowheads, normal tenocytes. Graph on the right column is the higher magnification of boxed area in middle column graph. Scale bar: 50 μm. (B, E, G) Immunohistochemical staining and (C, F, H) quantitative analysis of (B, C) CD68<sup>+</sup> macrophages, (E, F) pSmad2<sup>+</sup> cells and (G, H) MMP13<sup>+</sup> cells per tissue area (mm<sup>2</sup>) in Achilles tendons. Black arrowheads, MMP13<sup>+</sup> cells. Scale bar: 50 μm. (D) The concentration of active TGF-β1 in Achilles tendon in sham and ITR mice. All data are shown as the mean ± standard deviation (n = 8 per group). \*p < 0.05 as determined by unpaired, 2-tailed Student's *t*-test.

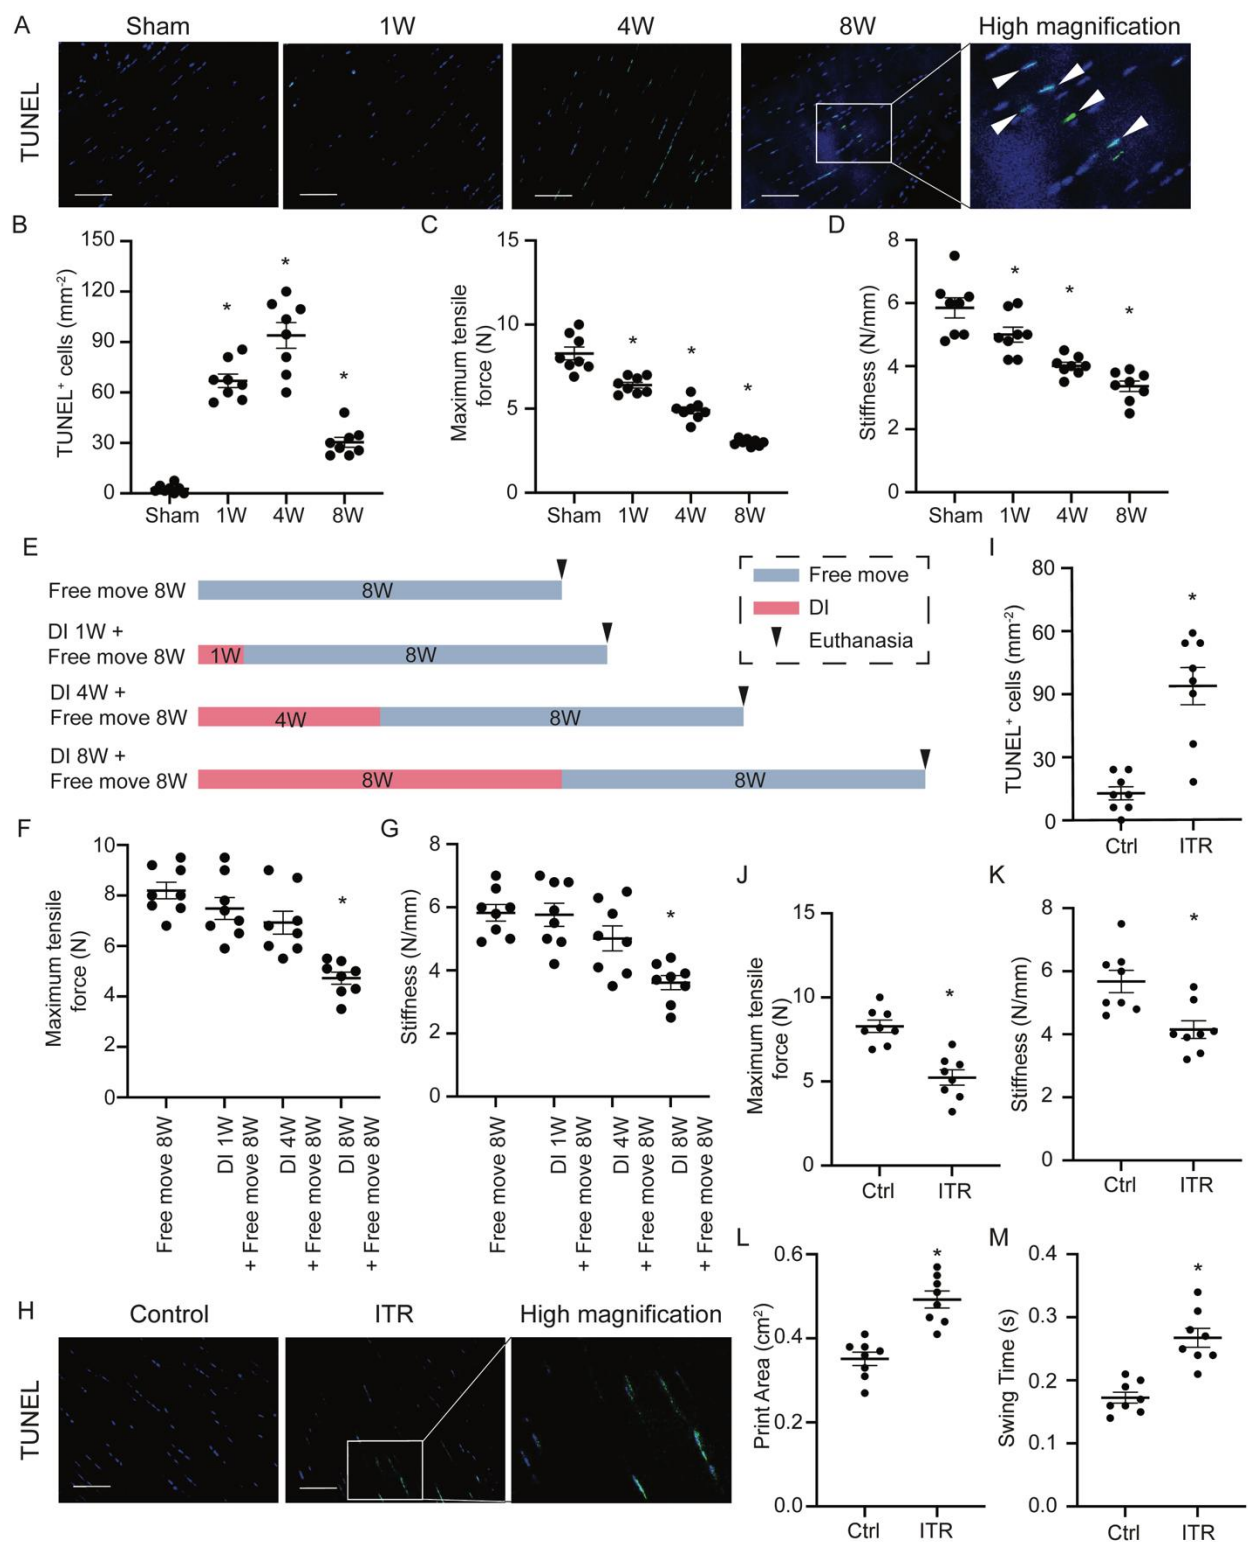

**Figure S3. Analysis of degeneration and biomechanical properties of tendinopathic Achilles**

**tendons in DI and ITR mice.** (A) TUNEL (terminal deoxynucleotidyl transferase dUTP nick end labeling) staining and (B) quantitative analysis of apoptotic cells in tendons 1, 4 and 8 weeks

after DI or after sham operation. White arrowheads, TUNEL<sup>+</sup> cells. Scale bar: 50  $\mu\text{m}$  (**C**, **D**) Quantitative analysis of (**C**) maximum tensile force and (**D**) stiffness of tendons measured 1, 4 and 8 weeks after DI or after sham operation. All data are shown as the mean  $\pm$  standard deviation (n = 8 mice per group). \*p < 0.05 compared with sham operated mice as determined by one-way analysis of variance to determine significance between groups. (**E**) A schematic diagram of the experiment. DI devices were applied to the mice for 1 week, 4 weeks or 8 weeks. After the last day of DI application, the mice were allowed to move freely in the cage for 8 weeks before euthanasia. (**F**, **G**) Quantitative analysis of (**F**) maximum tensile force and (**G**) stiffness of Achilles tendons 8 weeks after DI was removed. All data are shown as the mean  $\pm$  standard deviation (n = 8 mice per group). \*p < 0.05 compared with free move control group as determined by one-way analysis of variance. (**H**) TUNEL staining and (**I**) quantitative analysis of apoptotic cells in tendons in ITR induced tendinopathy mice and sham control mice. Scale bar: 50  $\mu\text{m}$ . (**J**, **K**) Quantitative analysis of (**J**) maximum tensile force and (**K**) stiffness of tendons after sham or ITR. (**L**) The footprint area and (**M**) the swing time of the hind foot of sham or ITR mice. All data are shown as the mean  $\pm$  standard deviation (n = 8 per group). \*p < 0.05 as determined by unpaired, 2-tailed Student's *t*-test.

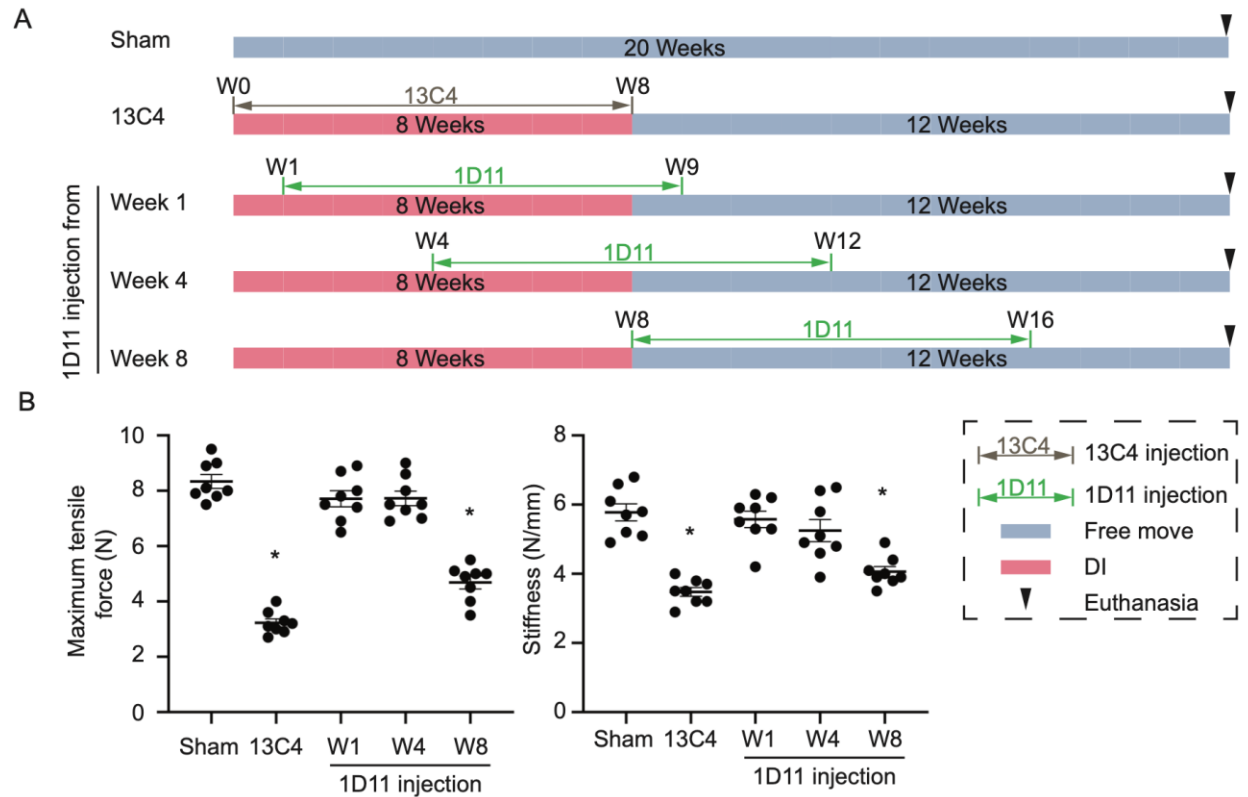

**Figure S4. Analysis of biomechanical properties of tendinopathic Achilles tendons after 1D11 injection from different time points.**

(A) A schematic diagram of the experiment. Mice were treated with 1D11 for 4 weeks from 1 week (W1), 4 weeks (W4) and 8 weeks (W8) after the day DI were applied for 8 weeks and analyzed 12 weeks after DI were removed. 13C4 injection for 8 weeks from the day DI were applied was used as a vehicle injection control. (B) Quantitative analysis of maximum tensile force and stiffness of Achilles tendons. All data are shown as the mean  $\pm$  standard deviation ( $n = 8$  mice per group). \* $p < 0.05$  compared with sham group as determined by one-way analysis of variance to determine significance between groups.

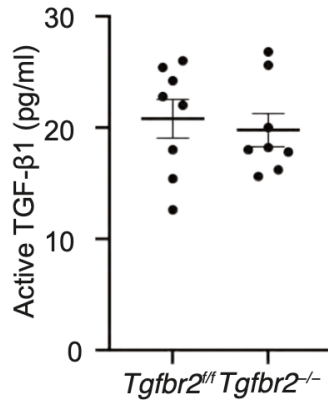

**Figure S5. Active TGF-β1 concentration did not change upon deletion of  $Tgfr2^{ff}$  in tenocytes.**

Tamoxifen was injected to  $Scx-creERT2::Tgfr2^{ff}$  mice to specifically delete  $Tgfr2$  ( $Tgfr2^{-/-}$ ) in the tenocytes. Tamoxifen treated  $Tgfr2^{ff}$  mice were used as controls. All data are shown as the mean  $\pm$  standard deviation (n = 8 mice per group). An unpaired, 2-tailed Student's *t*-test were used to test the differences.



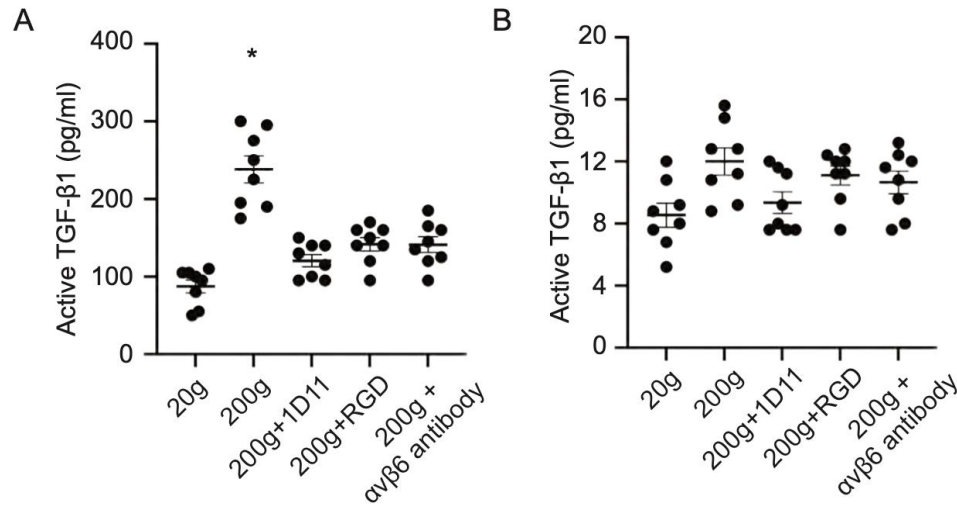

**Figure S6. Active TGF-β1 concentration in tendon and culture medium.**

(A) Active TGF-β1 concentrations in physiologically loaded tendons and overloaded tendons with vehicle, 1D11, RGD peptide and αvβ6 antibody, and in (B) culture medium. All data are shown as the mean ± standard deviation (n = 8 mice per group). \*p < 0.05 compared with 20g loaded group as determined by one-way analysis of variance.

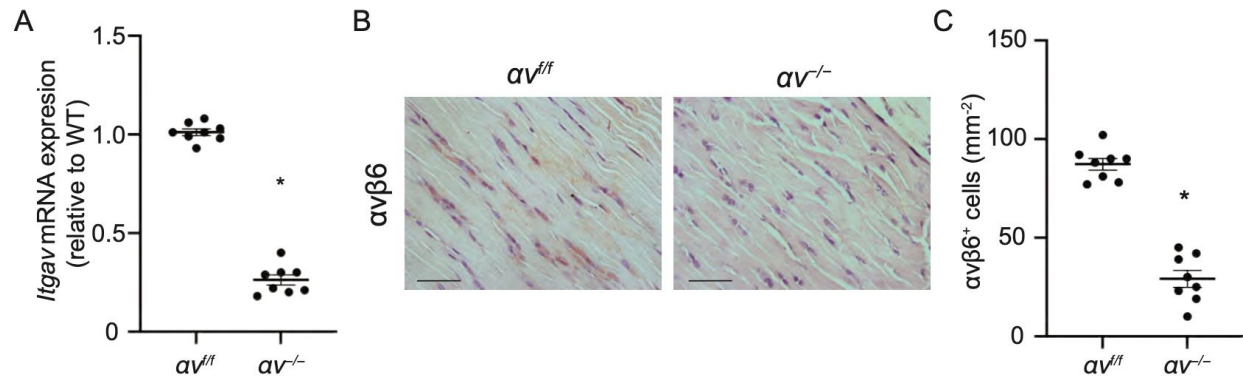

**Figure S7. Inducible knockout of  $\alpha V$  in  $Scx^+$  cells significantly decrease the expression of  $\alpha V\beta 6$  in tendons.**

(A) Message RNA expression of integrin  $\alpha V$  (*Itgav*) in Achilles tendons of *Scx-creERT2::\alpha V^{f/f}* and their WT  $\alpha V^{f/f}$  littermates 1 week after tamoxifen injection. (B) Immunostaining and quantification of tendon sections from *Scx-creERT2::\alpha V^{f/f}* and their WT  $\alpha V^{f/f}$  littermates with antibodies against  $\alpha V\beta 6$  4 weeks after DI. Scale bar: 50  $\mu m$ . All data are shown as the mean  $\pm$  standard deviation (n = 8 mice per group). \*p < 0.05 compared to  $\alpha V^{f/f}$  mice as determined by unpaired, 2-tailed Student's *t*-test.
